# Supplementary material for: Intravenous edaravone treatment in ALS and survival: An exploratory, retrospective, administrative claims analysis
Source: PubMed Central journal article supplement — eClinicalMedicine. 2022 Aug 4;52:101590. doi: 10.1016/j.eclinm.2022.101590 (PMC9358426; doi:10.1016/j.eclinm.2022.101590), 2022-08-04
Supplement: mmc1.pdf [file mmc1.pdf]

**Supplementary Material for:**

**Intravenous Edaravone Treatment in ALS Is Associated With Improved Survival: Results From an Administrative Claims Analysis**

**Brooks BR, et al.**

**Contents**

**Supplementary Table.** Demographic and clinical characteristics of patient population (before matching).....2

**Supplementary Figure.** Standard mean difference of variables between IV edaravone-treated ALS patients and non-IV edaravone-treated ALS patients before and after matching.....4

**Supplementary Table.** Demographic and clinical characteristics of patient population (before matching).

| Characteristics                                      | IV Edaravone Treatment |                       | p value |
|------------------------------------------------------|------------------------|-----------------------|---------|
|                                                      | Yes                    | No                    |         |
| N                                                    | 320                    | 12,572                |         |
| Region, no. (%)                                      |                        |                       | 0.096   |
| Midwest                                              | 86 (26.9)              | 2866 (22.8)           |         |
| Northeast                                            | 59 (18.4)              | 1919 (15.3)           |         |
| South                                                | 102 (31.9)             | 4828 (38.4)           |         |
| West                                                 | 72 (22.5)              | 2914 (23.2)           |         |
| Unknown                                              | 1 (0.3)                | 45 (0.4)              |         |
| Age group, y, no. (%)                                |                        |                       | <0.001  |
| 18–39                                                | 5 (1.6)                | 516 (4.1)             |         |
| 40–49                                                | 32 (10.0)              | 1062 (8.4)            |         |
| 50–59                                                | 78 (24.4)              | 2263 (18.0)           |         |
| 60–69                                                | 113 (35.3)             | 3649 (29.0)           |         |
| 70–79                                                | 85 (26.6)              | 3447 (27.4)           |         |
| 80+                                                  | 7 (2.2)                | 1635 (13.0)           |         |
| Age, mean (SD)                                       | 62.7 (10.2)            | 65.1 (13.1)           | 0.001   |
| Sex, no. (%)                                         |                        |                       | 0.898   |
| Female                                               | 135 (42.2)             | 5434 (43.2)           |         |
| Male                                                 | 185 (57.8)             | 7135 (56.8)           |         |
| Unknown                                              | 0 (0.0)                | 3 (0.0)               |         |
| Race, no. (%)                                        |                        |                       | 0.428   |
| White                                                | 238 (74.4)             | 9040 (71.9)           |         |
| Other                                                | 51 (15.9)              | 2365 (18.8)           |         |
| Unknown                                              | 31 (9.7)               | 1167 (9.3)            |         |
| Payor, no. (%)                                       |                        |                       |         |
| Commercial                                           | 131 (40.9)             | 4709 (37.5)           | 0.226   |
| Medicare Advantage                                   | 189 (59.1)             | 7863 (62.5)           |         |
| Pre-index disease duration,* days, median (IQR)      | 97.5 (46.8, 251.2)     | 1132.0 (15.0, 2540.0) | <0.001  |
| Pre-index claims for cardiovascular disease, no. (%) | 30 (.4)                | 743 (5.9)             | 0.014   |
| History of riluzole prescription, no. (%)            | 209 (65.3)             | 2359 (18.8)           | <0.001  |

|                                                         |           |             |        |
|---------------------------------------------------------|-----------|-------------|--------|
| Pre-index claim for gastrostomy tube placement, no. (%) | 25 (7·8)  | 1893 (15·1) | <0·001 |
| Pre-index claim for artificial nutrition, no. (%)       | 39 (12·2) | 2504 (19·9) | 0·001  |
| Pre-index claim for noninvasive ventilation, no. (%)    | 54 (16·9) | 2441 (19·4) | 0·287  |
| Pre-index claims for all-cause hospitalization, no. (%) | 73 (22·8) | 5649 (44·9) | <0·001 |

\*Defined as the period between the date for first claim for ALS diagnosis and the first claim of IV edaravone for IV edaravone-treated patients or the date IV edaravone was available on the market (8 August 2017) for patients with no IV edaravone treatment.

ALS, amyotrophic lateral sclerosis. IV, intravenous. Y, year.

**Supplementary Figure.** Standard mean difference of variables between IV edaravone-treated ALS patients and non-IV edaravone-treated ALS patients before and after matching.

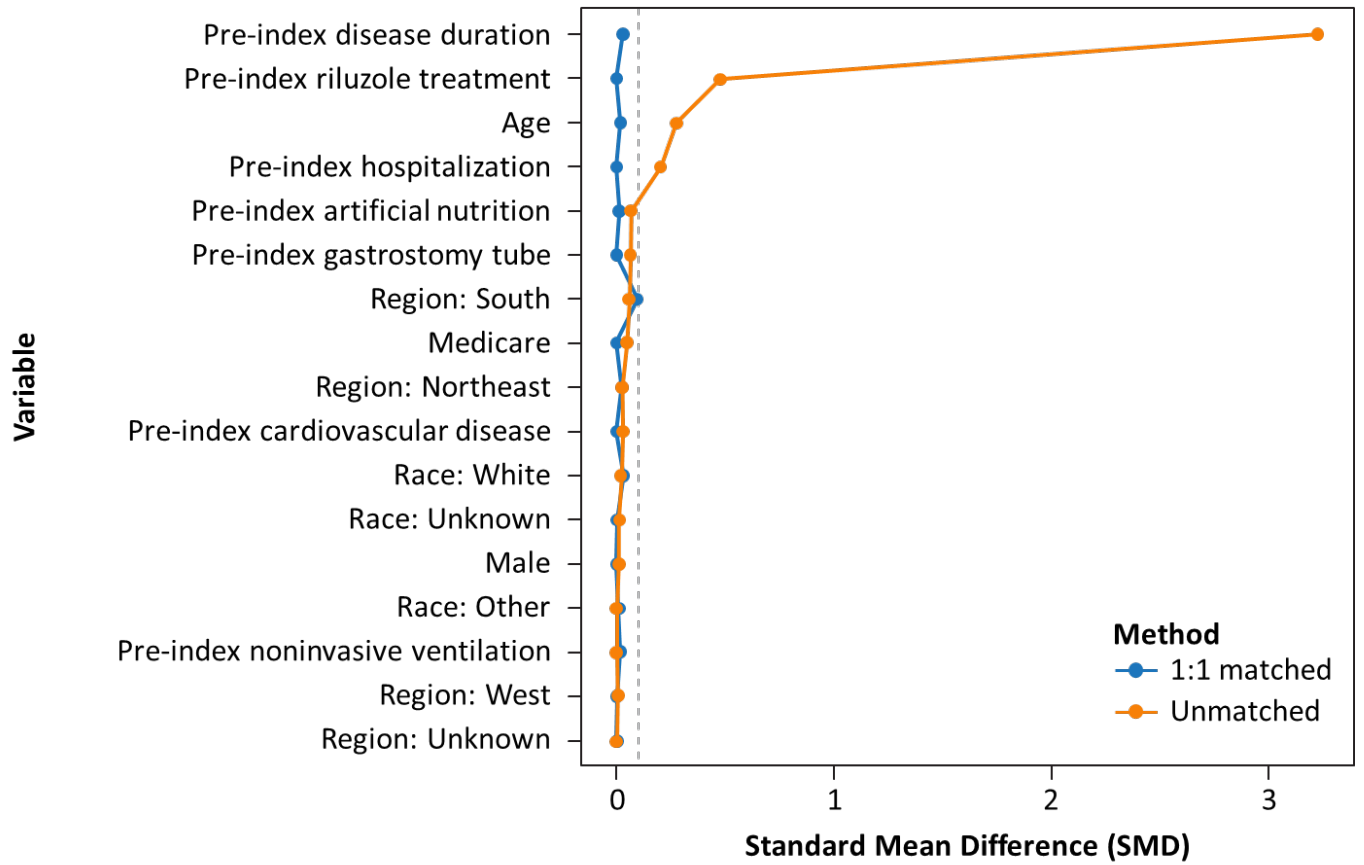

ALS, amyotrophic lateral sclerosis. IV, intravenous.
